# Supplementary material for: TIPE3 differentially modulates proliferation and migration of human non-small-cell lung cancer cells via distinct subcellular location
Source: Springer Nature journal article supplement (doi:10.1186/s12885-018-4177-0), 2018-03-06
Supplement: MOESM1 [file 15513460]

## Supplementary Material

### Comparison of long and short isoforms of human TIPE3

|                 |                                                         |     |
|-----------------|---------------------------------------------------------|-----|
| long_TIPE3.seq  | <b>MGKPRQNPSTLVSTLCEAEPKGLWVNGYAGTQGTRDATL</b>          | 40  |
| short_TIPE3.seq | .....                                                   | 0   |
| long_TIPE3.seq  | <b>QTRLIPLSFHLQRGKGLAAPLSALSAPRLPERPADGRVAV</b>         | 80  |
| short_TIPE3.seq | .....                                                   | 0   |
| long_TIPE3.seq  | <b>DAQPAARS</b> <b>MDSDSGEQSEGEFVTAAGPDVFSSKSLALQAA</b> | 120 |
| short_TIPE3.seq | ..... <b>MDSDSGEQSEGEFVTAAGPDVFSSKSLALQAA</b>           | 32  |
| long_TIPE3.seq  | <b>KKILSKIASKTVANMLIDDTSSSEIFDELYKVTKEHTHNKK</b>        | 160 |
| short_TIPE3.seq | <b>KKILSKIASKTVANMLIDDTSSSEIFDELYKVTKEHTHNKK</b>        | 72  |
| long_TIPE3.seq  | <b>EAHKIMKDLIKVAIKIGILYRNNQFSQEELVIVEKFRKKL</b>         | 200 |
| short_TIPE3.seq | <b>EAHKIMKDLIKVAIKIGILYRNNQFSQEELVIVEKFRKKL</b>         | 112 |
| long_TIPE3.seq  | <b>NQTAMTIVSFYEVEYTFDRNVLSNLLHECKDLVHELQRRH</b>         | 240 |
| short_TIPE3.seq | <b>NQTAMTIVSFYEVEYTFDRNVLSNLLHECKDLVHELQRRH</b>         | 152 |
| long_TIPE3.seq  | <b>LTPRTHGRINHFVNFHADVFLSTLYSLDGDCRPNLKRIC</b>          | 280 |
| short_TIPE3.seq | <b>LTPRTHGRINHFVNFHADVFLSTLYSLDGDCRPNLKRIC</b>          | 192 |
| long_TIPE3.seq  | <b>EGINKLLDEKV</b>                                      | 291 |
| short_TIPE3.seq | <b>EGINKLLDEKV</b>                                      | 203 |
